# Supplementary material for: Assessment of gut microbiota populations in lean and obese Zucker rats
Source: PLOS journal article supplement (doi:10.1371/journal.pone.0181451), 2017-07-13
Supplement: S2 (10.1371/journal.pone.0181451.s002) [file journal.pone.0181451.s002]

Lean\_0 Lean\_60 Obese\_0 Obese\_60

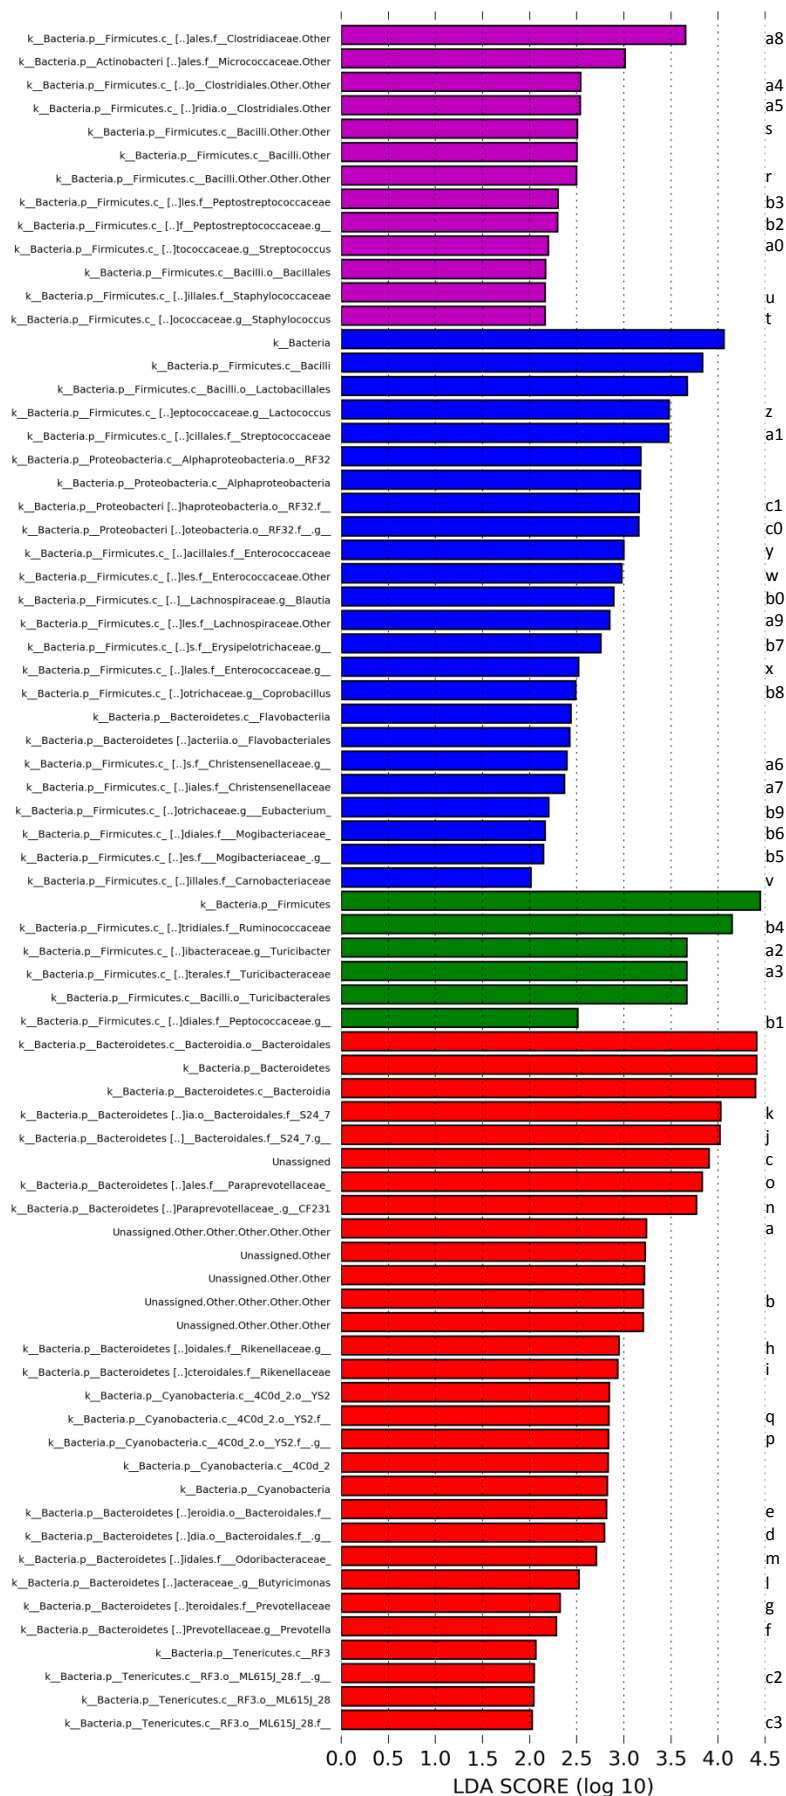

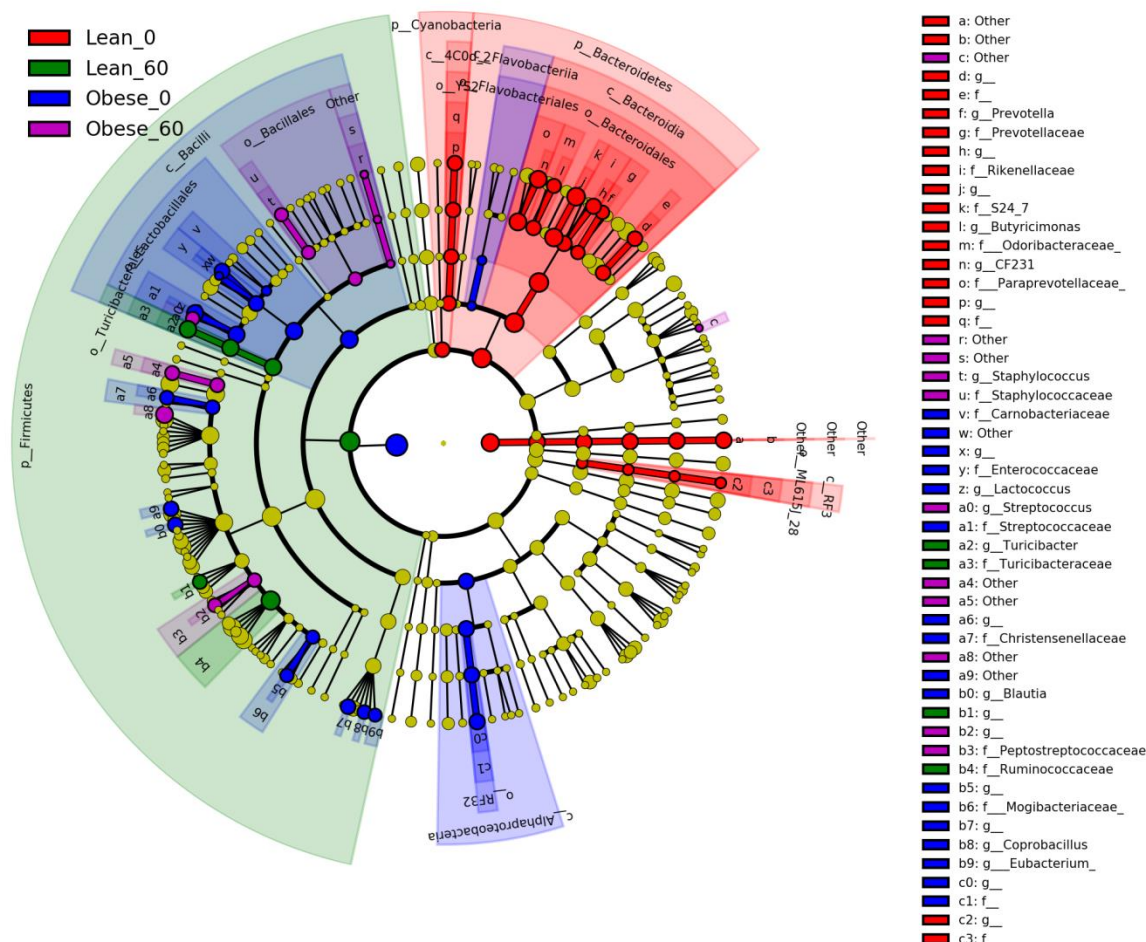

## S2 Fig. LEfSe analysis of microbiota differences for lean and obese Zucker rats at days 0 and 60.

The histogram shows the Linear Discriminant Analysis (LDA) scores for bacterial classifications that are significantly elevated in either the Lean\_0 (red), Lean\_60 (green), Obese\_0 (blue) or Obese\_60 (purple) groups. Bars are labeled to the left with the most stringent bacterial classification. Letters to the right of the bars correspond to the letters in the key of the circular cladogram. The cladogram displays the phylogenetic relationship of the bacterial classifications determined to be statistically distinct between the four sample groups.
